# Supplementary material
Source: PubMed Central journal article supplement (PMC3606029)
Supplement: NIHMS435318-supplement-125_2012_2809_MOESM1_ESM.pdf [file NIHMS435318-supplement-125_2012_2809_MOESM1_ESM.pdf]

**ESM Table 1** Sequences of primers used for real-time qPCR

|               | Forward                         | Reverse                       |
|---------------|---------------------------------|-------------------------------|
| Atf4          | GCA GCA GCA CCA GGC TCT         | TTG TCC GTT ACA GCA ACA CTG   |
| Chop          | CTG CCT TTC ACC TTG GAG AC      | CGT TTC CTG GGG ATG AGA TA    |
| Xbp1-s        | GAG TCC GCA GCA GGT G           | GTG TCA GAG TCC ATG GGA       |
| Xbp1-t        | AAG AAC ACG CTT GGG AAT GG      | ACT CCC CTT GGC CTC CAC       |
| Grp78         | GGT GCA GCA GGA CAT CAA GTT     | CCC ACC TCC AAT ATC AAC TTG A |
| Atf6 $\alpha$ | CTT CCT CCA GTT GCT CCA TC      | CAA CTC CTC AGG AAC GTG CT    |
| Adipoq        | CTC TAA AGA TTG TCA GTG GAT CTG | ACG TCA TCT TCG GCA TGA CT    |
| Fabp4         | AAT GTG TGA TGC CTT TGT GG      | CAC TTT CCT TGT GGC AAA GC    |
| Pparg         | TCT TCC ATC ACG GAG AGG TC      | GAT GCA CTG CCT ATG AGC AC    |
| Cebpa         | CCA AGA AGT CGG TGG ACA AG      | TTG TTT GGC TTT ATC TCG GC    |
| Cebpb         | GTT TCG GGA CTT GAT GCA AT      | GGC CCG GCT AGA CAG TTA C     |
| Pref1         | TGT GCA GGA GCA TTC GTA CT      | CGG GAA ATT CTG CGA AAT AG    |
| Atf3          | GGT CGC ACT GAC TTC TGA GG      | CTC TGG CCG TTC TCT GGA       |
| p58IPK        | TCC TGG TGG ACC TGC AGT ACG     | CTG CGA GTA ATT TCT TCC CC    |
| Ire1 $\alpha$ | CCTACAAGAGTATGTGGAGC            | GGTCTCTGTGAACAATGTTGAGAG      |
