# Supplementary material
Source: PubMed Central journal article supplement (PMC3606029)
Supplement: NIHMS435318-supplement-125_2012_2809_MOESM3_ESM.pdf [file NIHMS435318-supplement-125_2012_2809_MOESM3_ESM.pdf]

**a**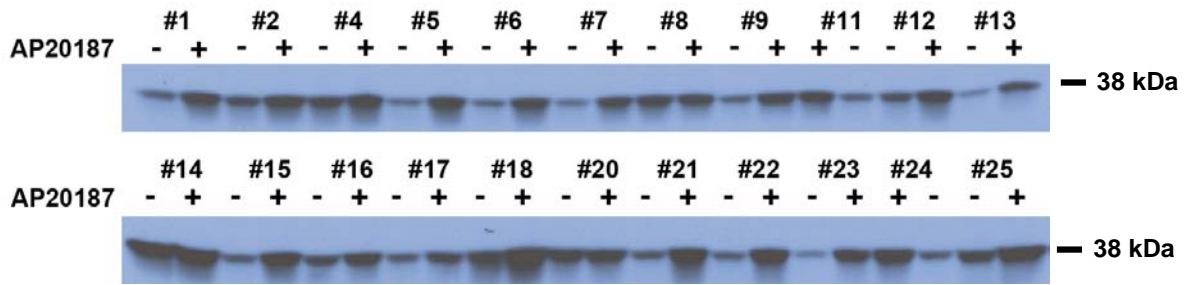**b**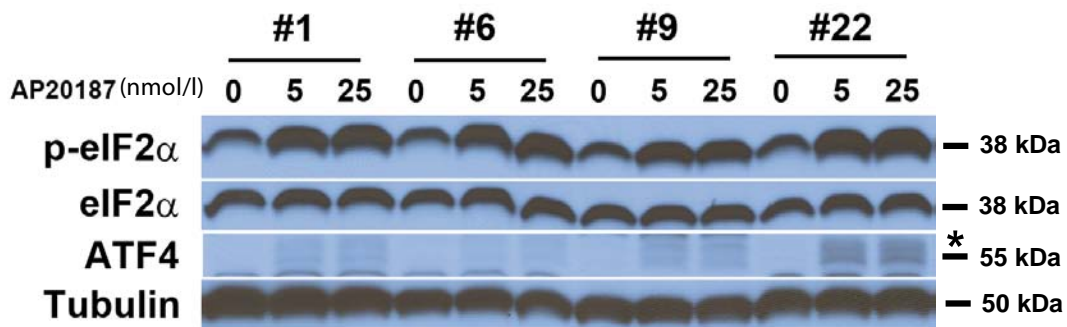

**ESM Fig. 2** Screening of 3T3-L1 cells expressing Fv2E-PERK. **(a)** Induction of eIF2 $\alpha$  phosphorylation by AP20187. 3T3-L1 cells were transduced with retrovirus expressing Fv2E-PERK, followed by puromycin (Sigma) selection (2  $\mu$ g/ml). After 2 weeks, twenty five clones were selected. AP20187 (5 nmol/l) were treated to induce eIF2 $\alpha$  phosphorylation. Cell lysates were collected and separated in SDS-PAGE gels. **(b)** Induction of ATF4 and eIF2 $\alpha$  phosphorylation by AP20187 treatment at indicated dosage in selected clones. \* indicates non-specific band.
