# Supplementary material
Source: PubMed Central journal article supplement (PMC3606029)
Supplement: NIHMS435318-supplement-125_2012_2809_MOESM4_ESM.pdf [file NIHMS435318-supplement-125_2012_2809_MOESM4_ESM.pdf]

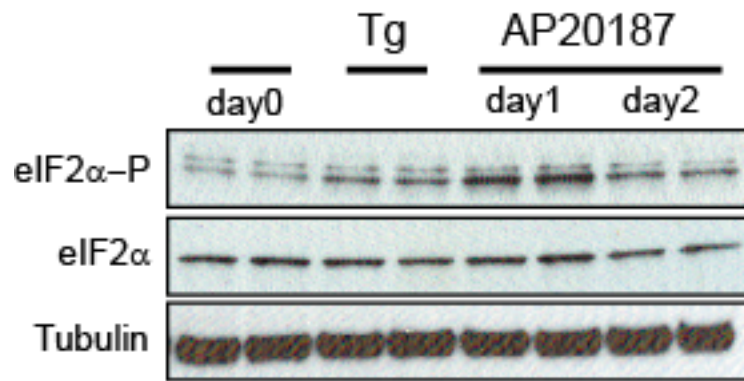

**ESM Fig. 3** The phosphorylation of eIF2 $\alpha$  during adipocyte differentiation on day 1 and day 2. Cell lysates were collected on day 0, day 1, and day 2 after adipocyte differentiation and separated in SDS-PAGE gels. As an ER stress control, Fv2E-PERK cells were treated with thapsigargin (300 nmol/l) for 1 h.
