# Supplementary material
Source: PubMed Central journal article supplement (PMC3606029)
Supplement: NIHMS435318-supplement-125_2012_2809_MOESM8_ESM.pdf [file NIHMS435318-supplement-125_2012_2809_MOESM8_ESM.pdf]

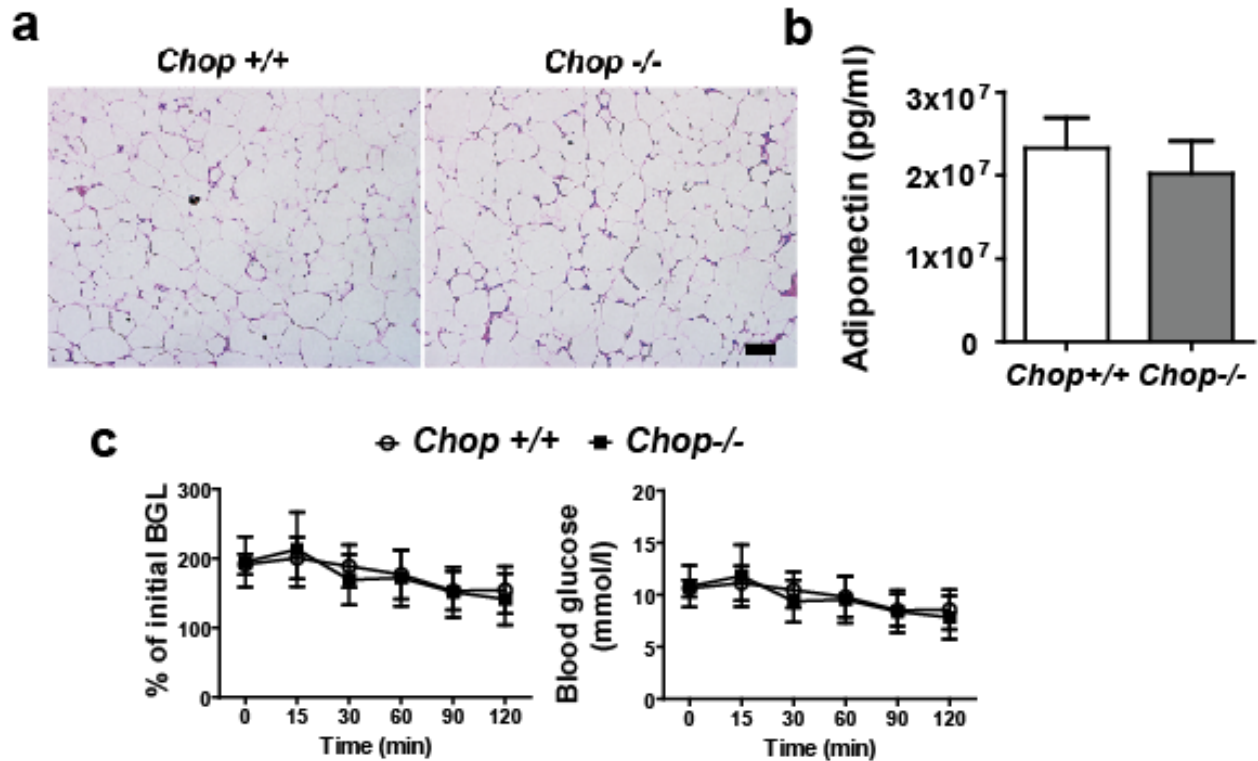

**ESM Fig. 7** (a) No significant cell size differences of fat pad, (b) serum adiponectin levels and (c) insulin tolerance from *Chop*<sup>+/+</sup> and *Chop*<sup>-/-</sup> mice fed HFD for 13 weeks. Representative images of adipose tissues from *Chop*<sup>+/+</sup> and *Chop*<sup>-/-</sup> mice fed a HFD for 13 weeks are shown in (a). Scale bar indicates 100  $\mu$ m. (b) Serum adiponectin levels. Sera were collected after 4-6 h fasting from *eIF2 $\alpha$ <sup>S/A</sup>* and *eIF2 $\alpha$ <sup>S/S</sup>* mice fed HFD for 13 weeks. Serum adiponectin levels were measured using adiponectin ELISA kit (EMD Millipore, Bilerica, MA, USA) according to manufacturer's instruction. c Insulin tolerance test (ITT). *Chop*<sup>+/+</sup> (n=5) and *Chop*<sup>-/-</sup> mice fed HFD for 13 weeks were challenged with insulin (0.75 U/kg body weight) and blood glucose levels were measured.
